# Supplementary material
Source: PubMed Central journal article supplement (PMC3136789)
Supplement: mmc1.pdf [file mmc1.pdf]

Supporting Material

Defining the Role of the Tension Sensor in the Mechanosensitive Channel of Small Conductance

Hannah R. Malcolm, Yoon-Young Heo, Donald E. Elmore, and Joshua A. Maurer

Email: maurer@wustl.edu

|                       | Forward                                                | Reverse                                                |
|-----------------------|--------------------------------------------------------|--------------------------------------------------------|
| L35A                  | AGTAAACATCGTGGCGGCAG<br>CCGCGATCATCATCG                | CGATGATGATCGCGGCTGCC<br>GCCACGATGTTTACT                |
| I39A                  | GCGGCACTCGCCATCATCGC<br>CGTTGGTTTGATTATCGC             | GCGATAATCAAACCAACGGC<br>GATGATGGCGAGTGCCGC             |
| L42A                  | CGCAATCATCATCGTTGGTG<br>CGATTATCGCGCGGATGATT           | AATCATCCGCGCGATAATCG<br>CACCAACGATGATGATTGCG           |
| I43A                  | AATCATCATCGTTGGTTTGGC<br>TATCGCGCGGATGATTTCC           | GGAAATCATCCGCGCGATAG<br>CCAAACCAACGATGATGATT           |
| L42A/I43A             | ACTCGCAATCATCATCGTTG<br>GTGCGGCTATCGCGAG               | CTCGCGATAGCCGCACCAAC<br>GATGATGATTGCGAGT               |
| R46A                  | GTTGGTTTGATTATCGCGGC<br>GATGATATCCAACGCGGT             | ACCGCGTTGGATATCATCGC<br>CGCGATAATCAAACCAAC             |
| N50A                  | GCGCGGATGATTTCCGCCGC<br>GGTGAATCGCCT                   | AGGCGATTCACCGCGGCGGA<br>AATCATCCGCGC                   |
| R54A                  | GGATGATATCCAACGCGGTG<br>AATGCCCTGATGATCTCC             | GGAGATCATCAGGGCATTCA<br>CCGCGTTGGATATCATCC             |
| R74A                  | TGCTGATTTTCTTTCTGCACT<br>AGTCGCTTACGGTATTATCG<br>CCTTT | AAAGGCGATAATACCGTAAG<br>CGACTAGTGCAGAAAGAAAA<br>TCAGCA |
| I78A                  | CTGCACTAGTCCGTTACGGT<br>ATTGCCGCCTTTACGCTAATC          | GATTAGCGTAAAGGCGGCAA<br>TACCGTAACGGACTAGTGCA<br>G      |
| L82A                  | GTATTATCGCCTTTACGGCA<br>ATCGCAGCCCTGGGAC               | GTCCCAGGGCTGCGATTGCC<br>GTAAAGGCGATAATAC               |
| I44A                  | CGCGATCATCATCGTTGGTTT<br>GATTGCCGCGCGGATGATA           | TATCATCCGCGCGGCAATCA<br>AACCAACGATGATGATCGCG           |
| I48A                  | TTGATTATCGCGCGGATGGC<br>TTCGAACGCGGTGAATCG             | CGATTCACCGCGTTCGAAGC<br>CATCCGCGCGATAATCAA             |
| F68A                  | AATAGATGCCACTGTTGCTG<br>ATGCTCTTTCTGCATTAGTCC<br>G     | CGGACTAATGCAGAAAGAGC<br>ATCAGCAACAGTGGCATCTA<br>TT     |
| Outer cloning primers | CAATTTACACAGGAAACAG<br>GC                              | TACACGGAGGCATCAGTGAC<br>CAA                            |

Table S1: PCR primers for MscS alanine point mutations.

|               | Stationary<br>Phase<br>Optical<br>Density<br>(OD <sub>600</sub> ) |
|---------------|-------------------------------------------------------------------|
| Wildtype MscS | 1.8                                                               |
| L35A          | 1.3                                                               |
| I39A          | 1.8                                                               |
| L42A          | 1.3                                                               |
| I43A          | 1.7                                                               |
| L42A/I43A     | 1.7                                                               |
| R46A          | 1.8                                                               |
| N50A          | 1.7                                                               |
| R54A          | 1.7                                                               |
| R74A          | 1.8                                                               |
| I78A          | 1.8                                                               |
| L82A          | 1.8                                                               |
| I44A          | 1.6                                                               |
| I48A          | 1.5                                                               |
| F68A          | 1.8                                                               |

Table S2: Stationary phase optical densities for MscS mutations. Stationary phase optical densities were obtained by growing a single colony to an OD<sub>600</sub> of approximately 0.5 in LB media, followed by induction with 0.1 mM IPTG for 8 hours.
